# Supplementary material
Source: MDPI journal article supplement (https://www.mdpi.com/2073-4344/11/2/214)

Supplementary Materials

# Production of Ethylene Glycol from Glycerol Using an In Vitro Enzymatic Cascade

Kai Li, Weikang Sun, Wensi Meng, Jinxin Yan, Yipeng Zhang, Shiting Guo, Chuanjuan Lü \*, Cuiqing Ma and Chao Gao

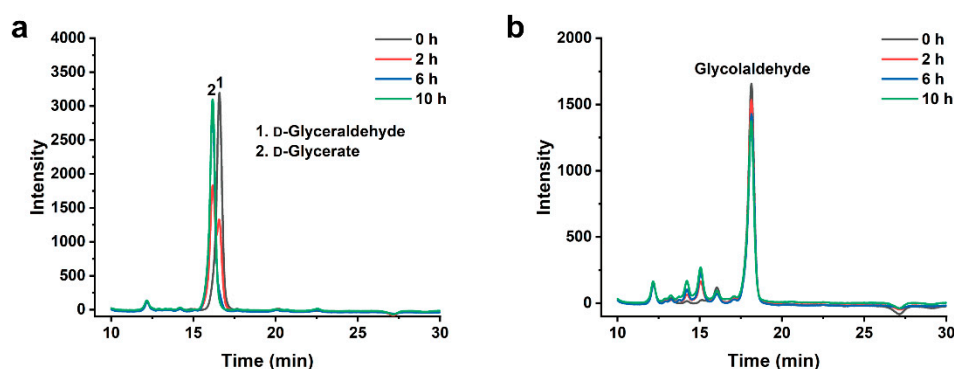

**Figure S1.** HPLC analysis of AldO<sub>mt</sub> catalyzed D-glyceraldehyde (a) and glycolaldehyde (b) oxidation. The reactions were carried out in a reaction mixture containing 50 mM HEPES-NaOH buffer (pH 7.4), 0.2 mg/mL AldO<sub>mt</sub>, 10 mM D-glyceraldehyde or 10 mM glycolaldehyde, at 30 °C and 150 rpm.

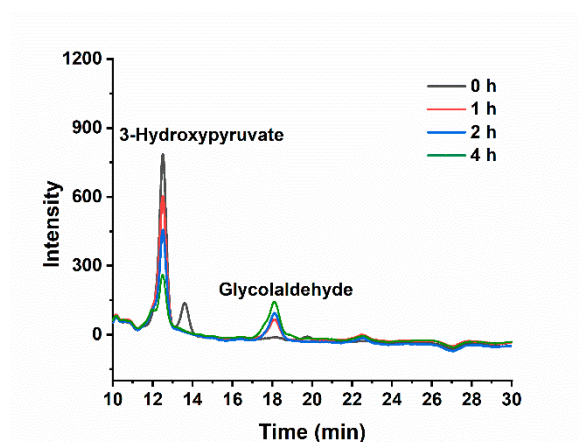

**Figure S2.** HPLC analysis of PDC catalyzed 3-hydroxypyruvate decarboxylation. The reaction was carried out in 50 mM HEPES-NaOH buffer (pH 7.4) containing 2 mM MgSO<sub>4</sub>, 0.25 mM TPP, 10 mM 3-hydroxypyruvate and 10 µg/mL PDC, at 30 °C and 150 rpm.

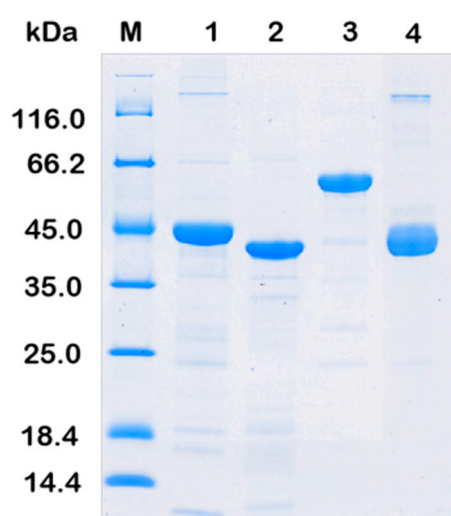

**Figure S3.** SDS-PAGE results of purified enzymes. M: Marker; 1: AldO<sub>mt</sub>; 2: GRHPR; 3: PDC; 4: FucO.

**Table S1.** Strains, plasmids and primers used in this study.

| Strain, plasmid and primer                          | Description                                                                                                         | Source     |
|-----------------------------------------------------|---------------------------------------------------------------------------------------------------------------------|------------|
| <b>Strain</b>                                       |                                                                                                                     |            |
| <i>E. coli</i> DH5α                                 | <i>supE44 ΔlacU169 (φ80 lacZΔM15) hsdR17 recA1 endA1 gyrA96 thi-1 relA1</i>                                         | Novagen    |
| <i>E. coli</i> BL21(DE3)                            | <i>F<sup>-</sup> ompT hsdSB (rB-mB-) gal (λ c I 857 ind1 Sam7 nin5 lacUV5 T7gene1) dcm (DE3)</i>                    | Novagen    |
| <i>E. coli</i> K12                                  | Wild-type                                                                                                           | Lab stock  |
| <i>E. coli</i> BL21(DE3)/pETDuet-AldO <sub>mt</sub> | <i>E. coli</i> BL21(DE3) expressing AldO from <i>Streptomyces coelicolor</i> A3(2) with double mutant (V125M/A244T) | Lab stock  |
| <i>E. coli</i> BL21(DE3)/pETDuet-GRHPR              | <i>E. coli</i> BL21(DE3) expressing GRHPR from <i>Pyrococcus furiosus</i>                                           | Lab stock  |
| <i>E. coli</i> BL21(DE3)/pETDuet-PDC                | <i>E. coli</i> BL21(DE3) expressing PDC from <i>Zymomonas mobile</i>                                                | Lab stock  |
| <i>E. coli</i> BL21(DE3)/p28a-FucO                  | <i>E. coli</i> BL21(DE3) expressing FucO from <i>Escherichia coli</i> K12                                           | This study |
| <b>Plasmid</b>                                      |                                                                                                                     |            |
| pET28a                                              | Expression vector, kanamycin <sup>r</sup>                                                                           | Novagen    |
| pET28a-FucO                                         | pET28a harboring gene fucO from <i>Escherichia coli</i> K12                                                         | This study |
| <b>Primer</b>                                       |                                                                                                                     |            |
| <i>fucO</i> -f                                      | CGGGATCCATGGCTAACAGAATGATTCTGAAC                                                                                    | This study |
| <i>fucO</i> -r                                      | CCCAAGCTTTTACCAGGCGGTATGGTAAAGCTC                                                                                   | This study |

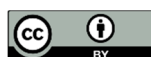

Supplement: s1 [file s1]
